# Supplementary material
Source: publisher site journal article supplement (https://www.dovepress.com/article/416098)
Supplement: Supplementary file 1 [file get_supplementary_file.php]

**Supplementary Materials**

# Fused deposition modeling printed PLA/nano β-TCP composite bone tissue engineering scaffolds for promoting osteogenic induction function

Wenzhao Wang1,2,*, Pan Liu3,*, Boqing Zhang4, Xingyu Gui4, Xuan Pei5, Ping Song2, Xia Yu6, Zhengdong Zhang7, 8, Changchun Zhou4

1 Department of Orthopaedics, Qilu Hospital of Shandong University, Shandong University Centre for Orthopaedics, Advanced Medical Research Institute, Shandong University, Jinan, Shandong, People’s Republic of China

2 Department of Orthopedics, West China Hospital of Sichuan University, Chengdu, Sichuan, People’s Republic of China

3 Hospital of Chengdu University of Traditional Chinese Medicine, Chengdu, Sichuan, People’s Republic of China

4 National Engineering Research Center for Biomaterials, College of Biomedical Engineering, Sichuan University, Chengdu, Sichuan, People’s Republic of China

5 State Key Laboratory of Biotherapy, West China Hospital, Sichuan University, Chengdu, Sichuan, People’s Republic of China

6 Department of Clinical Laboratory, Chengdu Women's and Children's Central Hospital, School of Medicine, University of Electronic Science and Technology of China, Chengdu, Sichuan, People’s Republic of China

7 School of Clinical Medicine, Chengdu Medical College, Chengdu, Sichuan, People’s Republic of China

8 Department of Orthopedics, The First Affiliated Hospital of Chengdu Medical College, Chengdu 610500, Sichuan, People’s Republic of China

* These authors contribute equally to this work.

Corresponding author: Xia Yu, Email irisyue2021@uestc.edu.cn; Zhengdong Zhang, Email doctorzzd@vip.qq.com


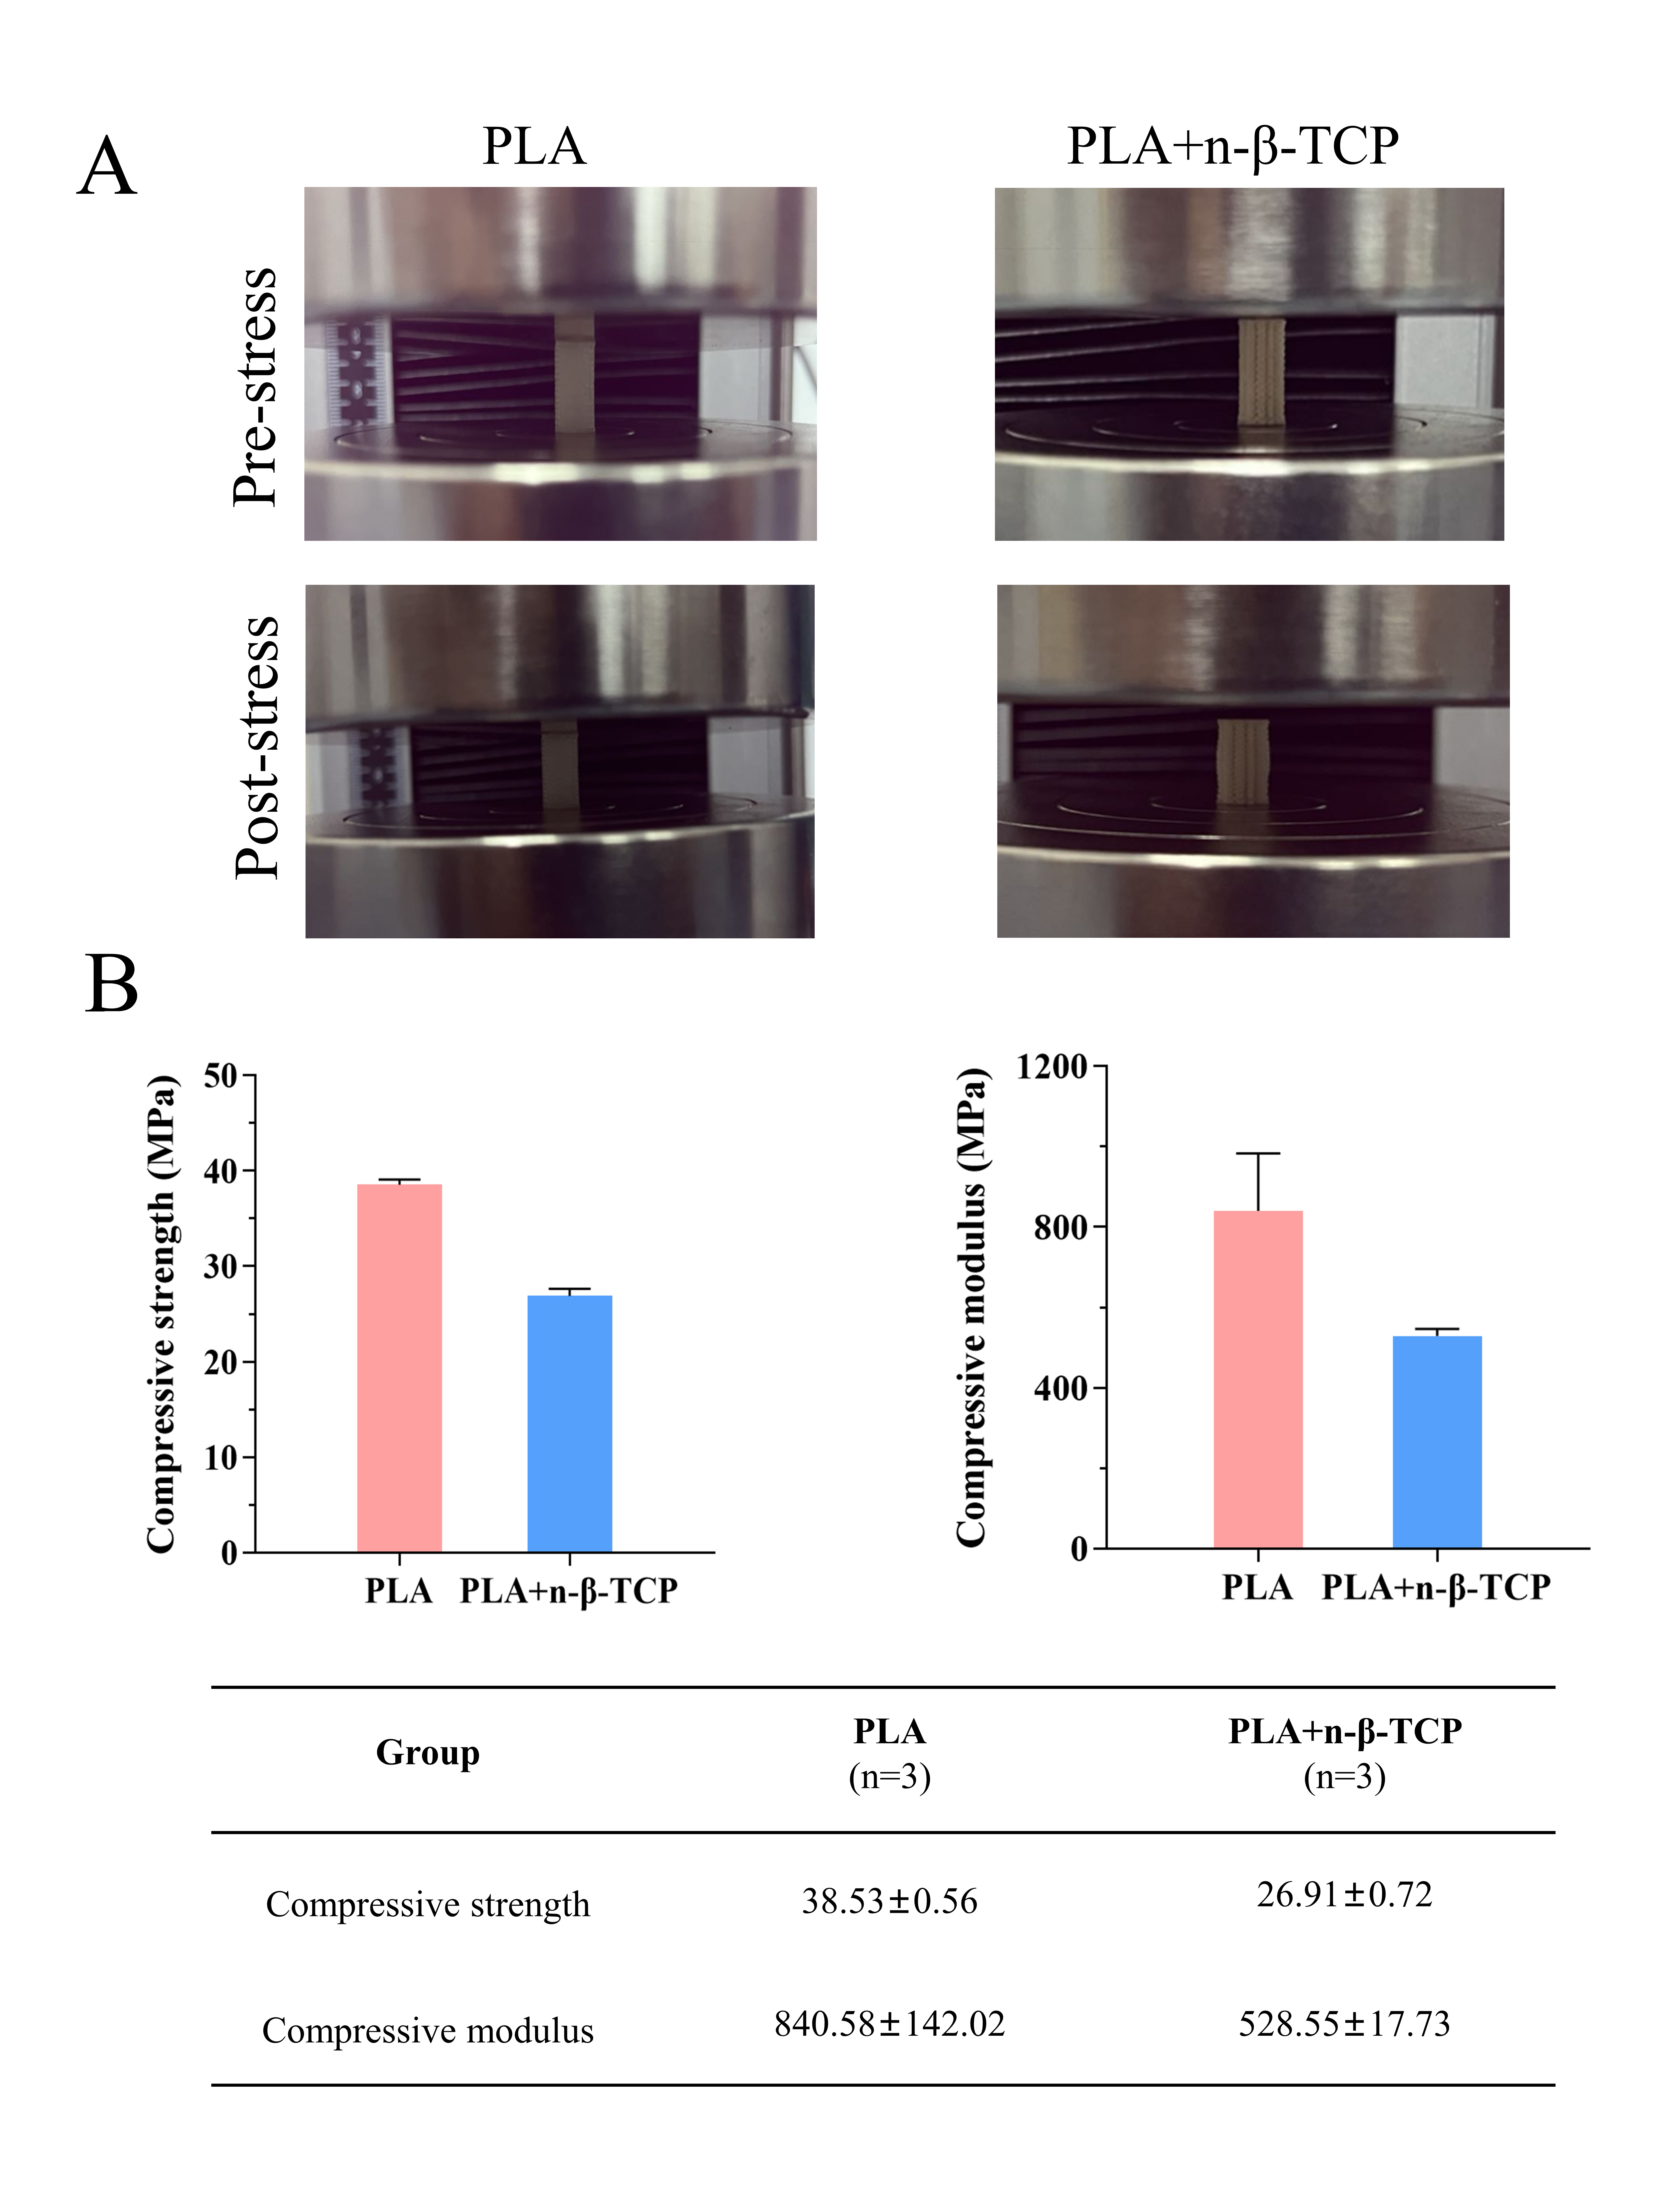


**Figure S1**. Mechanical performance of the pure PLA and the PLA/nano β-TCP scaffolds. (A) State of the two scaffold groups before and after compression. (B) Compressive strength and modulus of the two scaffold groups. PLA, polylactic acid; β-TCP, β-tricalcium phosphate.
